# Supplementary material for: Albumin-EDTA-Vanadium Is a Powerful Anti-Proliferative Agent, Following Entrance into Glioma Cells via Caveolae-Mediated Endocytosis
Source: MDPI journal article supplement (doi:10.3390/pharmaceutics13101557), 2021-09-25
Supplement: s1 [file s1]

# Supplementary Materials: Albumin-EDTA-Vanadium Is a Powerful Anti-Proliferative Agent, Following Entrance into Glioma Cells via Caveolae-Mediated Endocytosis

Itzik Cooper, Orly Ravid, Daniel Rand, Dana Atrakchi, Chen Shemesh, Yael Bresler, Gili Ben-Nissan, Michal Sharon, Mati Fridkin and Yoram Shechter

**Table S1.** Mass spectroscopy; MW calculations of HSA derivatives <sup>1</sup>

| Derivative                      | MW (Da) | Additional Mass (Da) | Relative Intensities of the Different Sub-Populations (%) |
|---------------------------------|---------|----------------------|-----------------------------------------------------------|
| Mercapto-HSA                    | 66,436  | –                    | 84.9                                                      |
| HSA-S-MAL-EDTA<br>[lot#7152021] | 66,595  | +159                 | 55.48                                                     |
| HSA-S-MAL-EDTA<br>[lot#7302021] | 66,583  | +147                 | 55.47                                                     |

<sup>1</sup> Masses (in Da) were calculated using the UniDec algorithm. Masses are shown for the most abundant subpopulation in each sample.

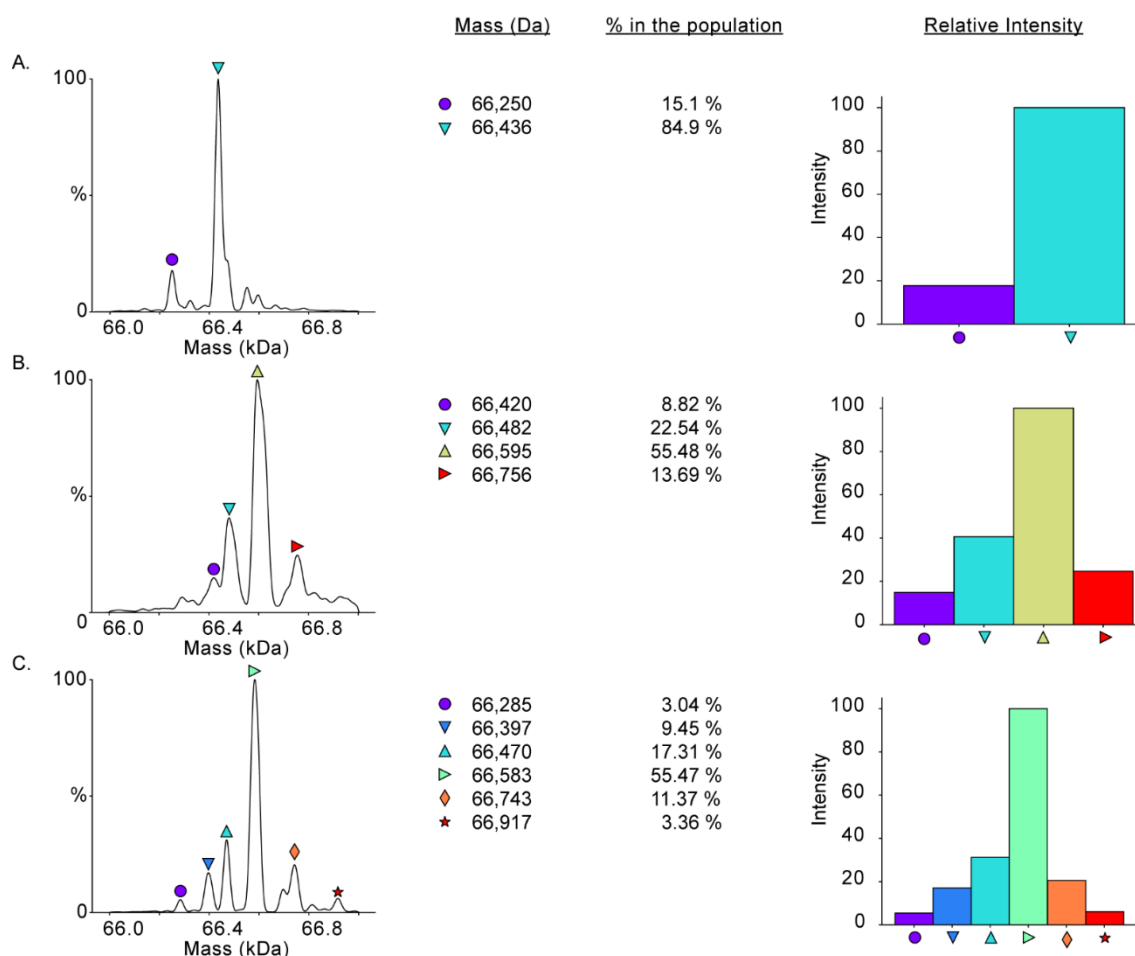

**Figure S1.** Mass spectrometry measurements. The left panel shows the deconvoluted mass distribution of the samples; (A) mercapto-HSA; (B) HSA-S-MAL-EDTA [lot#7152021]; and (C) HSA-S-MAL-EDTA [lot#7302021]. Measured masses of the different sub-populations, their % in the populations, and their relative intensities are shown on the right.

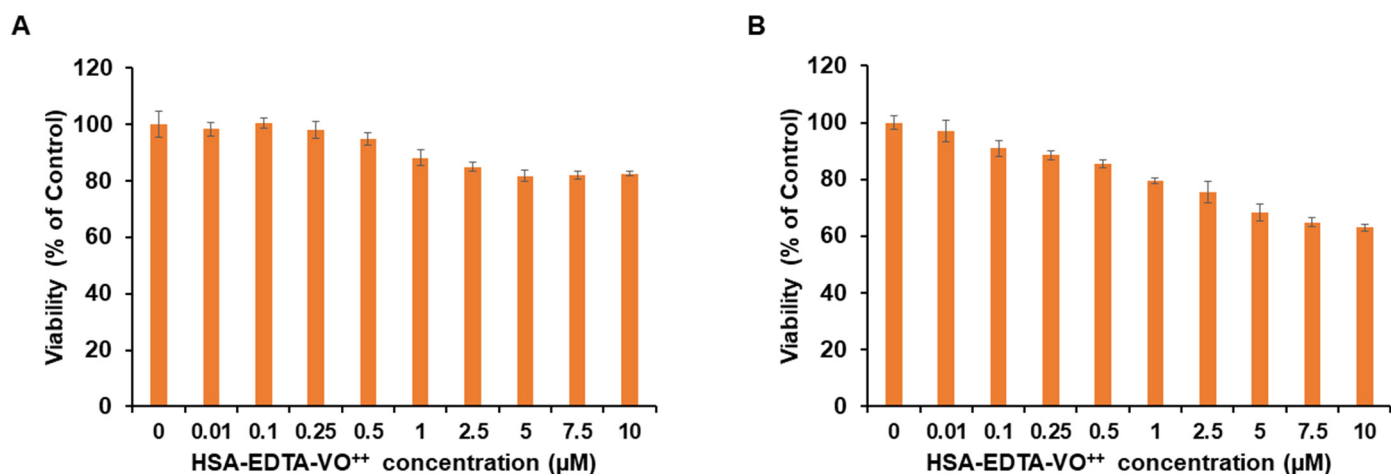

**Figure S2.** Anti-proliferative efficacies of HSA-EDTA-VO<sup>++</sup> in non-cancer cells. Dose-dependent toxicity experiments were conducted as described in the Methods section. Human CD34<sup>+</sup> endothelial cells (**A**) or primary bovine brain pericytes (**B**) were treated for 72 h with increasing concentrations of HSA-EDTA-VO<sup>++</sup> in ECM medium before MTT toxicity assay was applied to determine their anti-proliferative efficacies. Experiments were repeated twice with  $n = 10-15$ . Data are presented as the mean percentage  $\pm$ SD.
